# Supplementary material for: The role of nano-biochar reduces the impact of phenanthrene on wheat photosynthesis
Source: Royal Society of Chemistry journal article supplement (doi:10.1039/d4en00887a), 2025-01-01
Supplement: d4en00887a1.pdf [file d4en00887a1.pdf]

## *Supplementary Information*

### **The Role of Nano-Biochar Reduce the Impact of Phenanthrene on Wheat Photosynthesis**

Menghan Cui <sup>1</sup>, Jin Zhang <sup>1</sup>, Chenghao Huang <sup>2</sup>, Shuangyuan Xu <sup>2</sup>, Bożena Czech <sup>3</sup>,  
Jiangang Han <sup>1,4</sup>, Yu Shen <sup>1,\*</sup>, Xinhua Zhan <sup>2,\*</sup>

<sup>1</sup> Co-Innovation Center for the Sustainable Forestry in Southern China National Positioning Observation Station of Hung-tse Lake Wetland Ecosystem in Jiangsu Province; College of Ecology and Environment, Nanjing Forestry University, Nanjing 210037, China;

<sup>2</sup> College of Resources and Environmental Sciences, Nanjing Agricultural University, Nanjing 210095, China;

<sup>3</sup> Department of Radiochemistry and Environmental Chemistry, Institute of Chemical Sciences, Faculty of Chemistry, Maria Curie-Skłodowska University in Lublin, Lublin 20-031, Poland;

<sup>4</sup> School of Chemical Engineering and Materials, Changzhou Institute of Technology, Changzhou 213032, China.

\* Corresponding Authors

Yu Shen, Ph.D.,

Email: [yushen@njfu.edu.cn/sheyttmax@hotmail.com](mailto:yushen@njfu.edu.cn/sheyttmax@hotmail.com);

Xinhua Zhan, Ph.D.,

Email:

[xhzhan@njau.edu.cn](mailto:xhzhan@njau.edu.cn).

## Section 1: The Characteristics of nBCs.

In this study, the biochar was primarily derived from rice and corn straws were selected and pyrolyzed at 350 °C, 500 °C, and 650 °C. Subsequently, the biochar materials underwent nanosizing treatment, followed by ethanol washing and other methods to remove potential polycyclic aromatic hydrocarbons (PAHs) residues from the biochar surface. Finally, the nanosized biochar was ground using a ball mill to obtain nano-scale biochar materials. Therefore, this section mainly focuses on characterizing these six types of nBCs and evaluating their adsorption performance for phenanthrene over time, ultimately selecting the optimal nBC material for further experimental research.

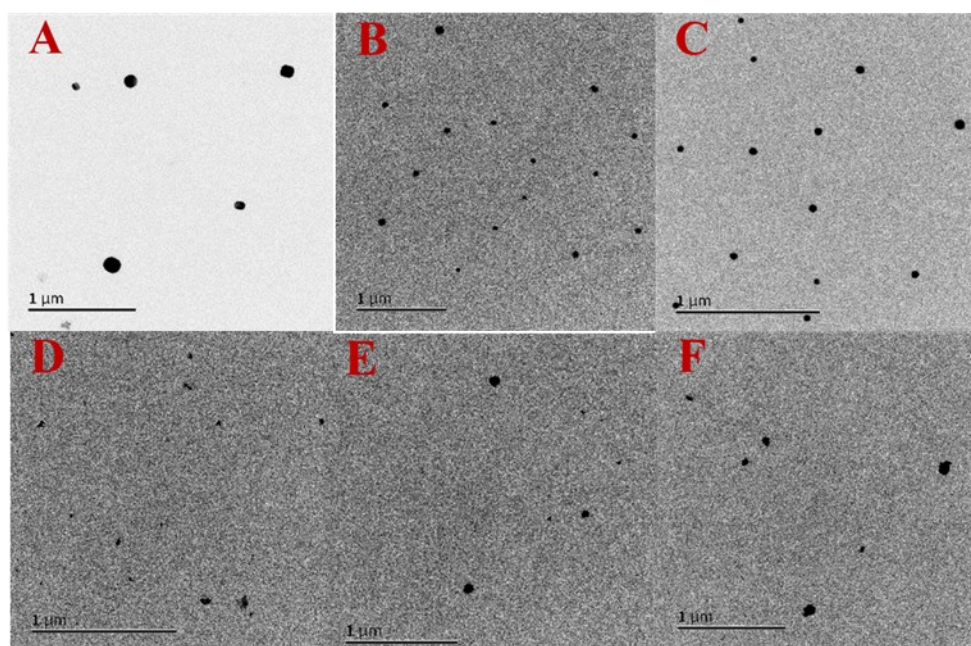

**Figure S1. TEM images of six types of nBC.**

(Note, the nBC prepared from corn straw at 350°C, 500°C, and 650°C (A - C), the nBC prepared from rice straw at 350°C, 500°C, and 650°C (D, E, F), respectively; nBC, nano-biochar.)

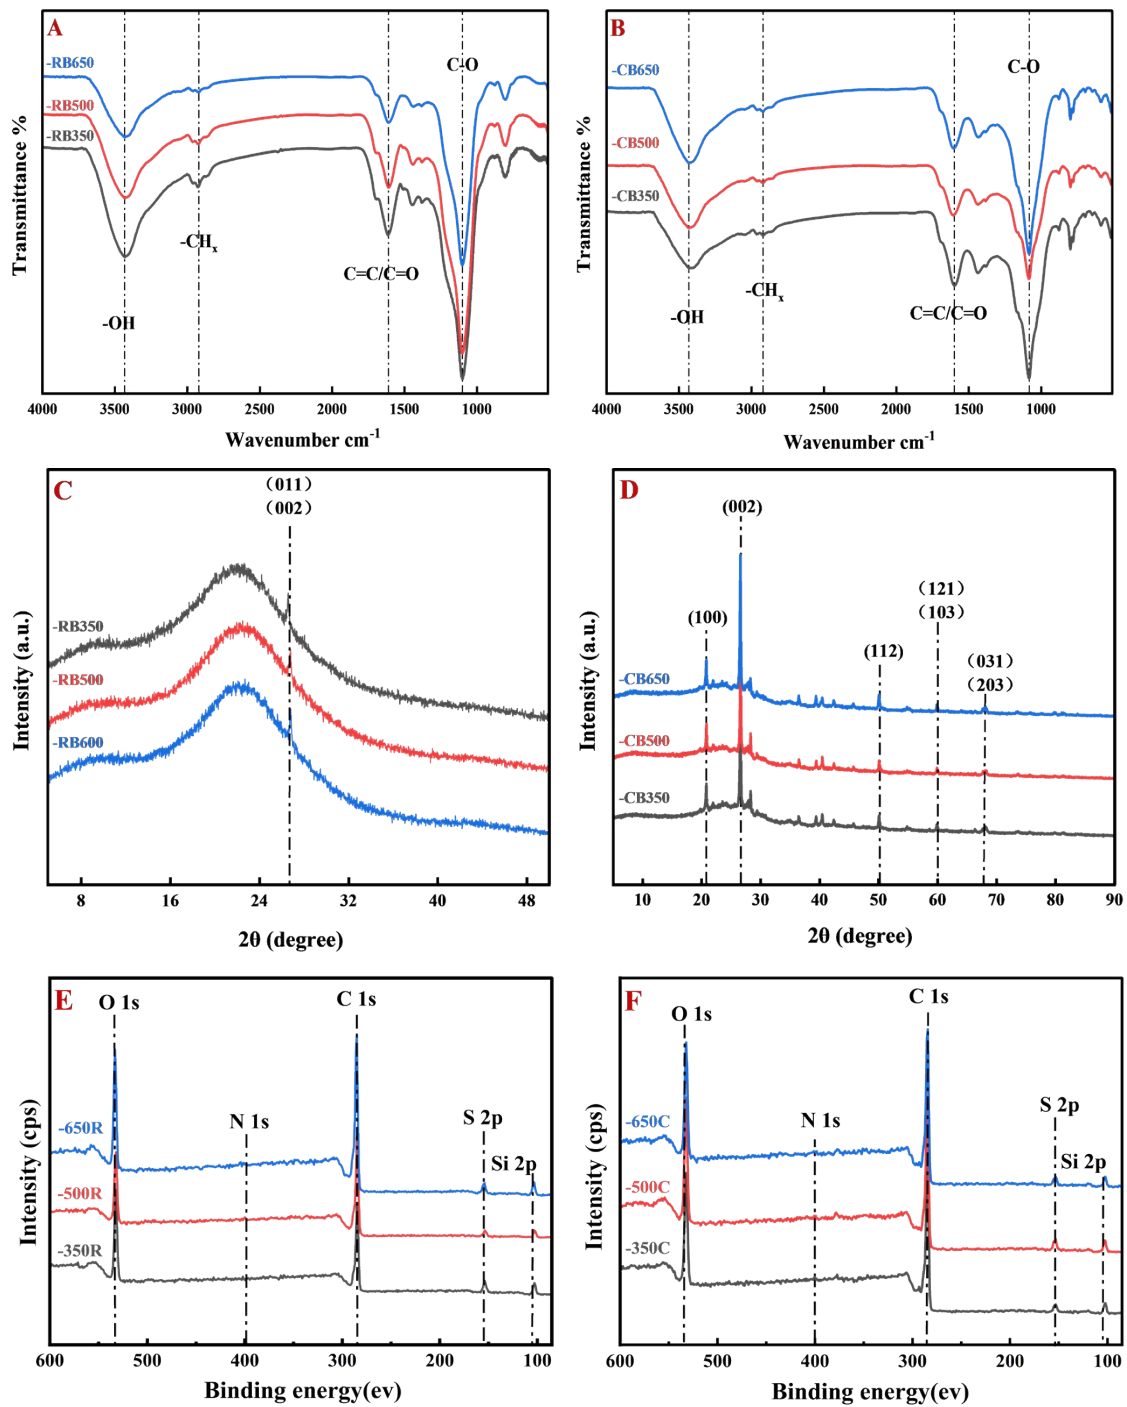

**Figure S2. (A, B) FTIR, (C, D) XRD spectra, and (E, F) XPS whole pattern of nBC.** (Note, RB650, RB500, RB350 represent the nBC prepared from rice straw at 650 °C, 500 °C and 350 °C, and CB650, CB500, CB350 represent nBC prepared from corn stover at 650 °C, 500 °C and 350 °C, respectively; nBC, nano-biochar.)

**Table S1. Biochar nanoparticles colloidal stability**

| Label                                | Description | Hydrated Particle Size<br>(nm) | Polydispersity Index<br>(PDI) | Zeta Potential<br>(mV) |
|--------------------------------------|-------------|--------------------------------|-------------------------------|------------------------|
| Nano rice biochar -<br>350°C treated | RSB 350     | 853.2 ± 12.4                   | 0.38 ± 0.04                   | -43.8 ± 4.3            |
| Nano rice biochar -<br>500°C treated | RSB 500     | 740.0 ± 12.2                   | 0.34 ± 0.03                   | -47.5 ± 2.5            |
| Nano rice biochar -<br>650°C treated | RSB 650     | 715.0 ± 14.2                   | 0.31 ± 0.03                   | -52.5 ± 5.4            |
| Nano corn biochar -<br>350°C treated | CSB 350     | 959.7 ± 9.2                    | 0.41 ± 0.05                   | -38.5 ± 4.2            |
| Nano corn biochar -<br>500°C treated | CSB 500     | 850.0 ± 13.2                   | 0.36 ± 0.04                   | -42.5 ± 3.5            |
| Nano corn biochar -<br>650°C treated | CSB 650     | 825.0 ± 15.8                   | 0.33 ± 0.03                   | -47.5 ± 5.5            |

## Section 2: Adsorption Kinetics of PHE on nBCs.

Investigation of the time-dependent adsorption performance of nBCs for PHE. Six nano-biochar materials, prepared as described above, were individually added at a concentration of  $1.0 \text{ mg L}^{-1}$  to a solution containing  $1.0 \text{ mg L}^{-1}$  phenanthrene. Adsorption experiments were conducted at  $25 \text{ }^\circ\text{C}$  and 200 rpm. During the adsorption process, samples were taken at 0.25, 1, 2, 4, 8, 12, 24, 48, and 96 h, centrifuged at 4000 rpm for 10 minutes, and the supernatant was collected to determine the residual PHE concentration. By comparing the adsorption rates of phenanthrene at checkpoints, the nBCs with the optimal adsorption performance for phenanthrene was selected. Each treatment was performed in triplicate times.

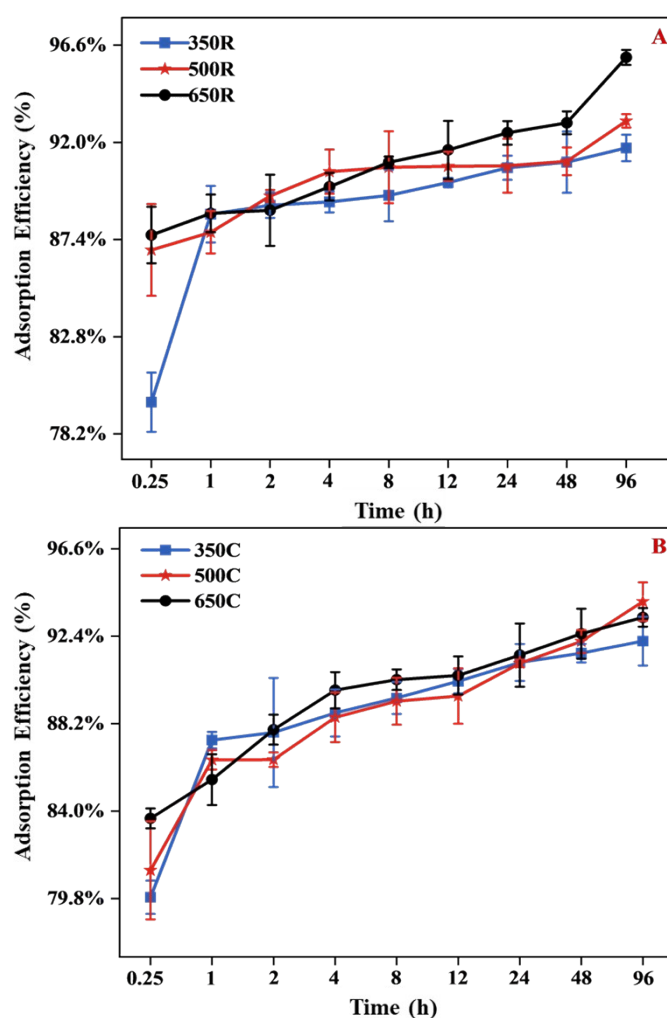

**Figure S3. Adsorption kinetic of PHE by six types of nBC.**

(Note, 350R, 500R, and 650R represent nBC made from rice straw fired at  $350 \text{ }^\circ\text{C}$ ,  $500 \text{ }^\circ\text{C}$ , and  $650 \text{ }^\circ\text{C}$ , and 350C, 500C, and 650C represent nBC made from corn stover fired at  $350 \text{ }^\circ\text{C}$ ,  $500 \text{ }^\circ\text{C}$ , and  $650 \text{ }^\circ\text{C}$ , respectively; nBC, nano-biochar; PHE, phenanthrene.)

### Section 3: The Growth and SPAD of the Wheat Seedlings under PHE Treatments.

The biomass data corroborated our visual observations and provided quantitative evidence of the effects of PHE stress and nBC treatment on wheat seedling growth after 30 days (Table S2).

**Table S2. Fresh and dry weights of per wheat seedlings under different treatments at day 9.**

| Treatment     | Shoot Fresh<br>Weight | Root Fresh<br>Weight | Shoot Dry<br>Weight | Root Dry<br>Weight |
|---------------|-----------------------|----------------------|---------------------|--------------------|
| Control       | 3.52 ± 0.15 a         | 1.28 ± 0.08 a        | 0.42 ± 0.03 a       | 0.15 ± 0.01 a      |
| nBC           | 3.61 ± 0.18 a         | 1.33 ± 0.09 a        | 0.44 ± 0.03 a       | 0.16 ± 0.01 a      |
| PHE           | 2.48 ± 0.22 c         | 0.89 ± 0.07 c        | 0.29 ± 0.02 c       | 0.10 ± 0.01 c      |
| PHE + 0.5 nBC | 2.89 ± 0.19 b         | 1.05 ± 0.08 b        | 0.34 ± 0.02 b       | 0.12 ± 0.01 b      |
| PHE + 1.0 nBC | 3.18 ± 0.17 ab        | 1.16 ± 0.09 ab       | 0.38 ± 0.03 ab      | 0.14 ± 0.01 ab     |

(Note, Data are means ± SD (n = 3); Different letters indicate significant differences among treatments ( $p < 0.05$ ))

A Chlorosis Severity Index (CSI) was calculated based on the affected area percentage and reduction in green intensity. The CSI values confirmed the visual observations.

Chlorosis Severity Index (CSI) Calculation is followed the equation below,

$$CSI = (Ac/At) \times (1 - GIc/GIh) \times 100$$

where,

Ac, Area showing chlorosis (pixels); At, Total leaf area (pixels); GIc, Green intensity of chlorotic area; and GIh, Green intensity of healthy tissue.

And the result was shown below,

**Table S3. Chlorosis Severity Index (CSI) of wheat seedlings under different treatments**

| Treatment  | Day 7      | Day 9      |
|------------|------------|------------|
| Control    | 2.1±0.3 a  | 2.3±0.4 a  |
| nBC        | 2.3±0.4 a  | 2.4±0.3 a  |
| PHE        | 45.6±3.2 d | 68.7±4.1 d |
| PHE+0.5nBC | 31.2±2.8 c | 42.3±3.5 c |
| PHE+1.0nBC | 18.4±2.1 b | 25.6±2.8 b |

Note, values represent mean ± SD (n=3). Different superscript letters indicate significant differences between treatments ( $p < 0.05$ ).

Relative chlorophyll content (SPAD) is one of the most important biochemical parameters affecting crop growth, and it is also an indicator of the photosynthetic capacity of plants as well as an important indicator for evaluating crop growth. The portable handheld multifunctional plant photosynthesis meter Photosynq MultiseQ v2.0 was utilized to determine the SPAD values of wheat seedling leaves.

The formulas developed by Wood et al. (1993) to calculate chlorophyll content from SPAD values as below,

$$(1) C_{Chl a} = 0.05 \times SPAD - 0.27 \quad (1)$$

$$(2) C_{Chl b} = 0.013 \times SPAD + 0.04 \quad (2)$$

$$(3) C_{total Chl} = 0.062 \times SPAD - 0.24 \quad (3)$$

Among them:

$C_{Chl}$  is the chlorophyll content (in  $\text{mg g}^{-1}$ ); and SPAD is the measured SPAD value.

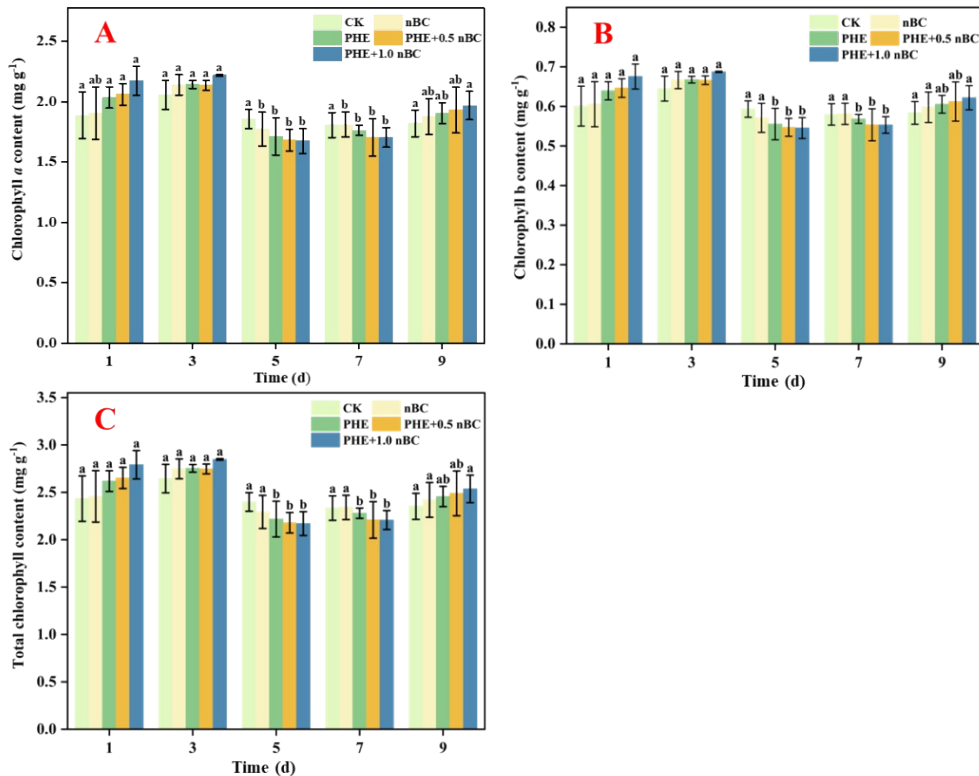

**Figure S4. Changes of SPAD calculated chlorophyll *a* (A), chlorophyll *b* (B), and total chlorophyll (C) in wheat leaves.**

(Note, CK, control; nBC, 1.0  $\text{mg L}^{-1}$  nBC; PHE, 1.0  $\text{mg L}^{-1}$  PHE; PHE+0.5 nBC, 1.0  $\text{mg L}^{-1}$  PHE + 0.5  $\text{mg L}^{-1}$  nBC; PHE+1.0 nBC, 1.0  $\text{mg L}^{-1}$  PHE + 1.0  $\text{mg L}^{-1}$  nBC; different letters



indicate significant differences ( $p < 0.05$ .)

**Table S4.** The Paired Sample T-test of measured chlorophyll content and chlorophyll content obtained from SPAD values.

| Paired Sample T-test        | Day             | T-statistic | P-value  | Conclusion                                                                                                 |
|-----------------------------|-----------------|-------------|----------|------------------------------------------------------------------------------------------------------------|
| <b>Chlorophyll <i>a</i></b> | Day 1 vs Day1.1 | 0.244466    | 0.810416 | Reject the null hypothesis (No statistically significant difference between each two sets of measurements) |
|                             | Day 3 vs Day3.1 | 0.079482    | 0.937774 |                                                                                                            |
|                             | Day 5 vs Day5.1 | -0.096010   | 0.924873 |                                                                                                            |
|                             | Day 7 vs Day7.1 | -0.074877   | 0.941371 |                                                                                                            |
|                             | Day 9 vs Day9.1 | -0.026344   | 0.979354 |                                                                                                            |
| <b>Chlorophyll <i>b</i></b> | Day 1 vs Day1.1 | -0.372192   | 0.715322 | Reject the null hypothesis (No statistically significant difference between each two sets of measurements) |
|                             | Day 3 vs Day3.1 | 2.364263    | 0.005631 |                                                                                                            |
|                             | Day 5 vs Day5.1 | -1.611507   | 0.129377 |                                                                                                            |
|                             | Day 7 vs Day7.1 | -0.713350   | 0.487351 |                                                                                                            |
|                             | Day 9 vs Day9.1 | -1.028433   | 0.321187 |                                                                                                            |
| <b>Total chlorophyll</b>    | Day 1 vs Day1.1 | 0.054193    | 0.957546 | Reject the null hypothesis (No statistically significant difference between each two sets of measurements) |
|                             | Day 3 vs Day3.1 | -1.912142   | 0.076541 |                                                                                                            |
|                             | Day 5 vs Day5.1 | 0.339714    | 0.739114 |                                                                                                            |
|                             | Day 7 vs Day7.1 | -0.0759054  | 0.946041 |                                                                                                            |
|                             | Day 9 vs Day9.1 | -1.177454   | 0.067044 |                                                                                                            |

## Section S4. Data Analysis

### (1) Data Normality, ANOVA, and Independence Check.

**Table S5 Data Tests.**

| <b>Data</b>                               | <b>Test</b>                             | <b>Statistic</b> | <b>p-value</b> | <b>Conclusion</b>                                              |
|-------------------------------------------|-----------------------------------------|------------------|----------------|----------------------------------------------------------------|
| <b>Chlorophyll<br/>a</b>                  | Shapiro-Wilk<br>(Normality)             | 0.968436         | 0.057911       | Reject null hypothesis (Data is normally distributed)          |
|                                           | Welch's ANOVA                           | 4.315984         | 0.006481       | Reject null hypothesis (Data is normally distributed)          |
|                                           | Chi-square test of independence         | 16.0             | 1.0            | Reject the null hypothesis (Two variables are independent)     |
| <b>Chlorophyll<br/>b</b>                  | Shapiro-Wilk<br>(Normality)             | 0.988821         | 0.756031       | Reject null hypothesis (Significant difference between groups) |
|                                           | Welch's ANOVA                           | 8.581324         | 0.000065       | Reject null hypothesis (Data is normally distributed)          |
|                                           | Chi-square test of independence         | 16.0             | 1.0            | Reject the null hypothesis (Two variables are independent)     |
| <b>Total<br/>chlorophyll</b>              | Shapiro-Wilk<br>(Normality)             | 0.982779         | 0.401402       | Reject null hypothesis (Significant difference between groups) |
|                                           | Welch's ANOVA                           | 6.865857         | 0.000363       | Reject null hypothesis (Data is normally distributed)          |
|                                           | Chi-square test of independence         | 10.0             | 1.0            | Reject the null hypothesis (Two variables are independent)     |
| <b>PHE<br/>concentration<br/>of root</b>  | Shapiro-Wilk<br>(Normality)             | 0.943325         | 0.135477       | Reject null hypothesis (Data is normally distributed)          |
|                                           | Welch's ANOVA                           | 5.895114         | 0.000024       | Reject null hypothesis (Significant difference between groups) |
|                                           | Chi-square test of independence         | 8.0              | 1.0            | Reject the null hypothesis (Two variables are independent)     |
| <b>PHE<br/>concentration<br/>of shoot</b> | Shapiro-Wilk Test<br>(Normality)        | 0.877011         | 0.000196       | Reject null hypothesis (Data is normally distributed)          |
|                                           | Levene's Test<br>(Variance Homogeneity) | 2.10211          | 0.158206       | Reject null hypothesis (Levene's Test hypothesis is valid)     |
|                                           | Chi-square test of independence         | 8.0              | 1.0            | Reject the null hypothesis (Two variables are independent)     |
| <b>Fv/Fm</b>                              | Shapiro-Wilk Test<br>(Normality)        | 0.976021         | 0.165389       | Reject null hypothesis (Data is normally distributed)          |
|                                           | Levene's Test<br>(Variance Homogeneity) | 0.006925         | 0.934269       | Reject null hypothesis (Levene's Test hypothesis is valid)     |

|                                 |                                      |          |          |                                                            |
|---------------------------------|--------------------------------------|----------|----------|------------------------------------------------------------|
|                                 | Chi-square test of independence      | 16.0     | 1.0      | Reject the null hypothesis (Two variables are independent) |
| <b><math>\Phi_{PSII}</math></b> | Shapiro-Wilk Test (Normality)        | 0.972161 | 0.097076 | Reject null hypothesis (Data is normally distributed)      |
|                                 | Levene's Test (Variance Homogeneity) | 0.139275 | 0.711814 | Reject null hypothesis (Levene's Test hypothesis is valid) |
|                                 | Chi-square test of independence      | 16.0     | 1.0      | Reject the null hypothesis (Two variables are independent) |
| <b>qP</b>                       | Shapiro-Wilk Test (Normality)        | 0.947907 | 0.058341 | Reject null hypothesis (Data is normally distributed)      |
|                                 | Levene's Test (Variance Homogeneity) | 0.090141 | 0.766216 | Reject null hypothesis (Levene's Test hypothesis is valid) |
|                                 | Chi-square test of independence      | 16.0     | 1.0      | Reject the null hypothesis (Two variables are independent) |
| <b>NPQ</b>                      | Shapiro-Wilk Test (Normality)        | 0.939119 | 0.532072 | Reject null hypothesis (Data is normally distributed)      |
|                                 | Levene's Test (Variance Homogeneity) | 1.247622 | 0.273501 | Reject null hypothesis (Levene's Test hypothesis is valid) |
|                                 | Chi-square test of independence      | 16.0     | 1.0      | Reject the null hypothesis (Two variables are independent) |
